# Supplementary material for: MAP4K4 promotes chlamydial infectivity and genital tract inflammatory injury by negatively regulating protective immunity in Chlamydia infection
Source: Research Square preprint supplement (doi:10.21203/rs.3.rs-2419539/v1), 2023-03-29
Supplement: Supplementary file 1 [file ef73d10111c3ee8a52257c4f.docx]

Table 1. Load count of *Chlamydia* in mouse vaginal secretions (IFU)

| Group | Shedding *Chlamydia* from the Mice Vagina (Mean±SD, 105 IFU) | | | | | | | |
| --- | --- | --- | --- | --- | --- | --- | --- | --- |
| D3 | D6 | D9 | D12 | D15 | D18 | D21 | D24 |
| SPG | 0.00±0.00 | 0.00±0.00 | 0.00±0.00 | 0.00±0.00 | 0.00±0.00 | 0.00±0.00 | 0.00±0.00 | 0.00±0.00 |
| Cm | 6.45±1.04 | 42.17±7.64 | 19.59±2.08 | 20.25±2.51 | 9.16±1.53 | 3.98±1.00 | 0.88±0.14 | 0.02±0.00 |
| Cm+siNC | 7.45±1.00 | 40.29±1.53 | 15.49±2.08 | 15.00±1.53 | 9.92±0.58 | 3.62±0.58 | 0.34±0.00 | 0.05±0.00 |
| Cm+siMAP4K4 | 6.59±1.19 | 26.57±1.53 | 12.63±2.89 | 13.82±1.16 | 4.79±1.00 | 3.01±0.00 | 0.02±0.00 | 0.00±0.00 |

注：D3~D6, n=10; D9~D18, n=6; D21~D24, n=4; a total of 6 mice were sacrificed at D7, D15 and D21, and no mice died naturally during the period.
